# Supplementary material
Source: PubMed Central journal article supplement (PMC3527073)
Supplement: NIHMS424868-supplement-1_si_001.pdf [file NIHMS424868-supplement-1_si_001.pdf]

## Supplemental Material

### Nontargeted Analysis of DNA Adducts by Mass-Tag MS:

#### Reaction of *p*-Benzoquinone with DNA

Poguang Wang<sup>+</sup>, Jianxin Gao<sup>≠</sup>, Guodong Li<sup>‡</sup>, Olga Shimelis<sup>†</sup> and Roger W. Giese<sup>+\*</sup>

### Table of Contents

#### MALDI-TOF-MS and MALDI-TOF/TOF-MS Spectra

| Figure |                                                      | Page |
|--------|------------------------------------------------------|------|
| 1      | BQ-CMP                                               | 2    |
| 2      | BrBH-BQ-dCMP and BrBH-BQ-mdCMP                       | 3    |
| 3      | Two nucleotide reactions (dCMP and mdCMP) with BQ    | 4    |
| 4      | Combined nucleotide reactions                        | 5    |
| 5      | Additional fragment assignments relative to Figure 5 | 6    |

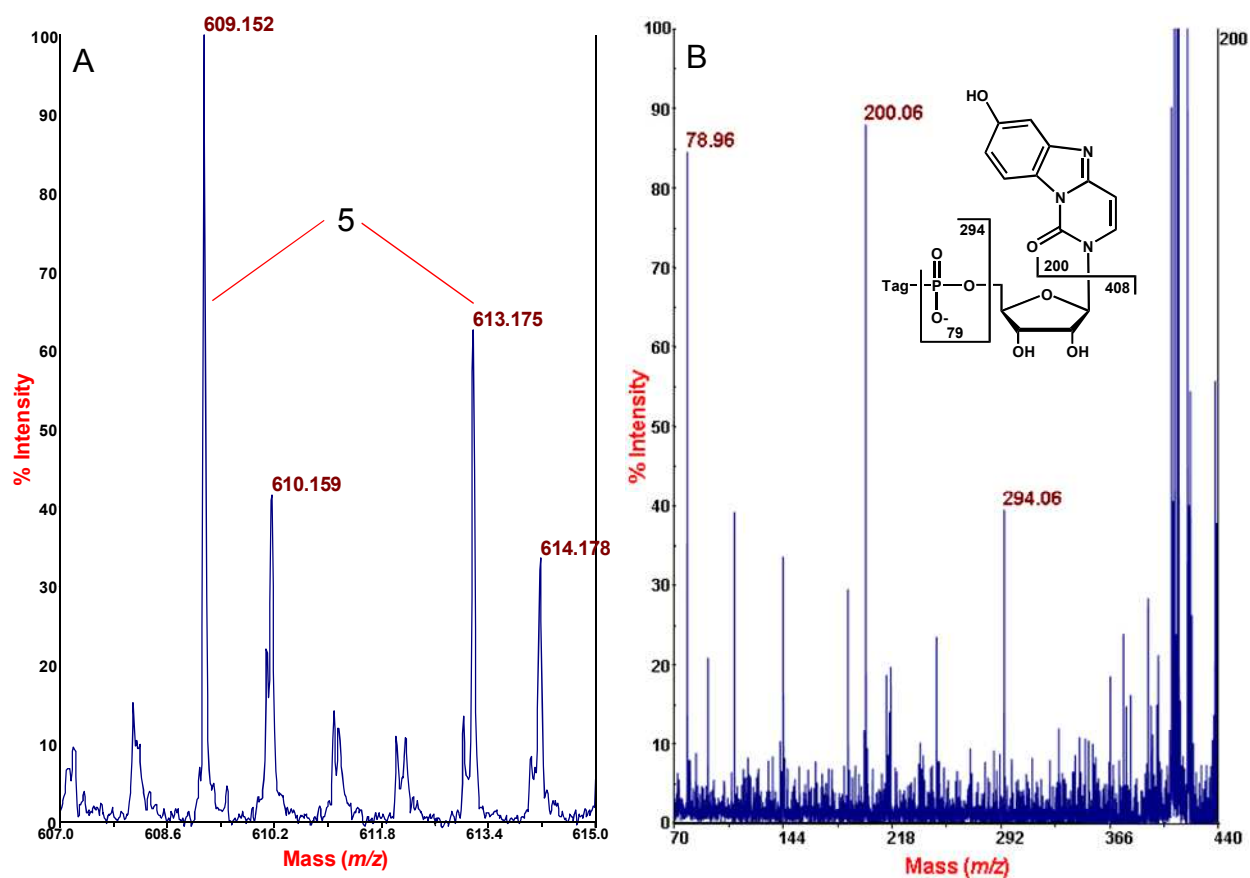

**Supplemental Figure 1.** **A.** Detection by MALDI-TOF-MS of ribonucleotide BQ-CMP (**5**) as a conjugate of BH at  $m/z$  609.152, and as a conjugate of BH( $d_4$ ) at  $m/z$  613.175, formed by reacting BQ with calf thymus DNA contaminated with RNA. **B.** Fragmentation analysis of  $m/z$  609.152.

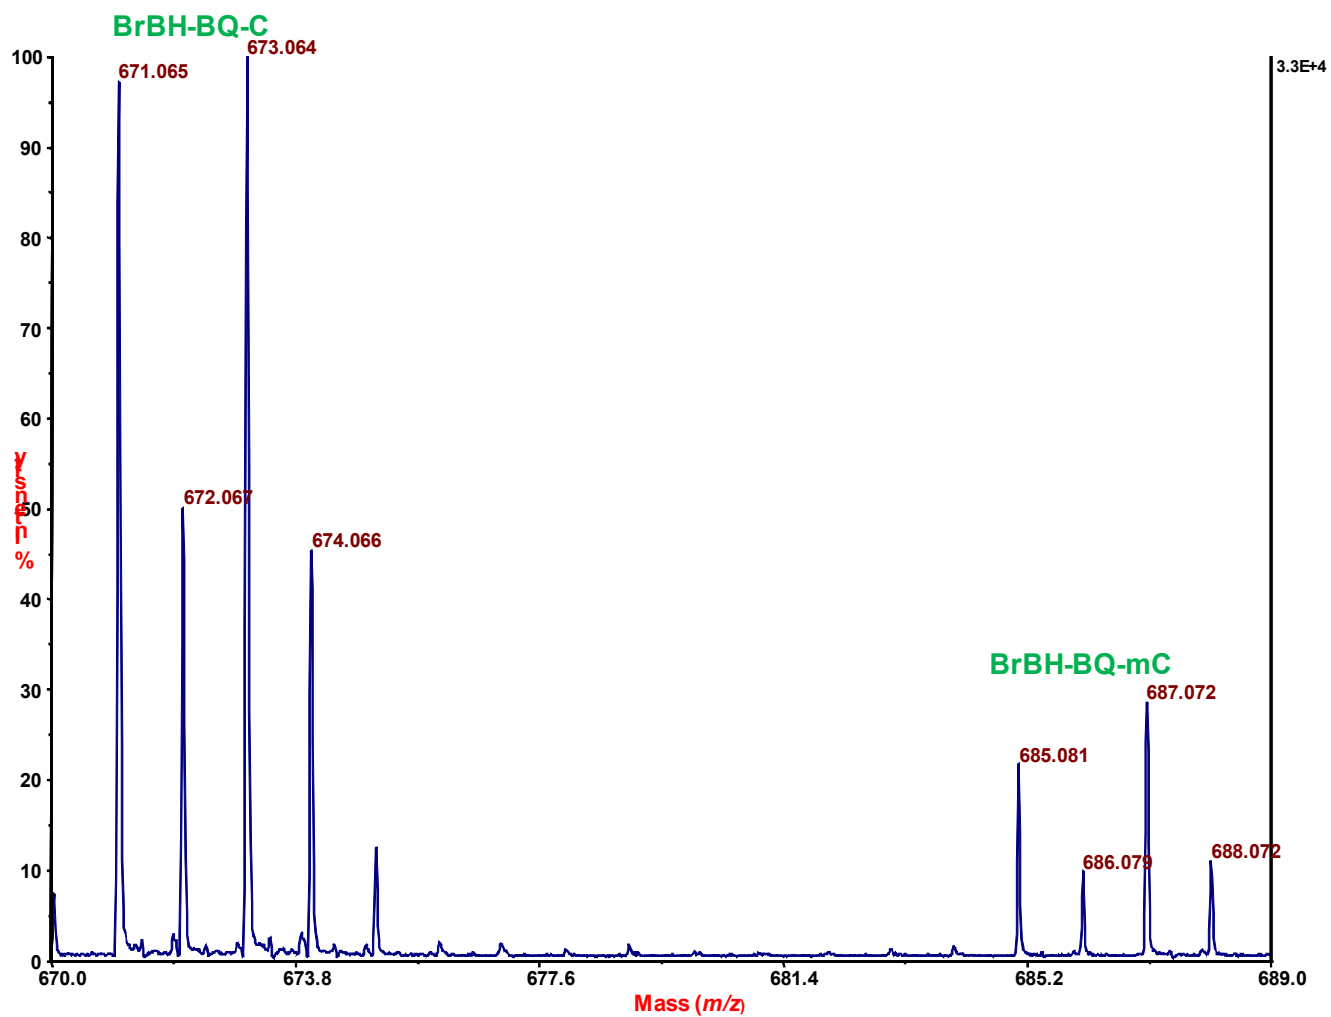

**Supplemental Figure 2.** Detection of BrBH-BQ-dCMP (at  $m/z$  671.065 and 673.064), and BrBH-BQ-mdCMP (at  $m/z$  685.081 and 687.072) from DNA reacted with hydroquinone in the presence of ferric chloride, followed by digestion, chromatography, mass tag labeling with BrBH, and MALDI-TOF-MS.

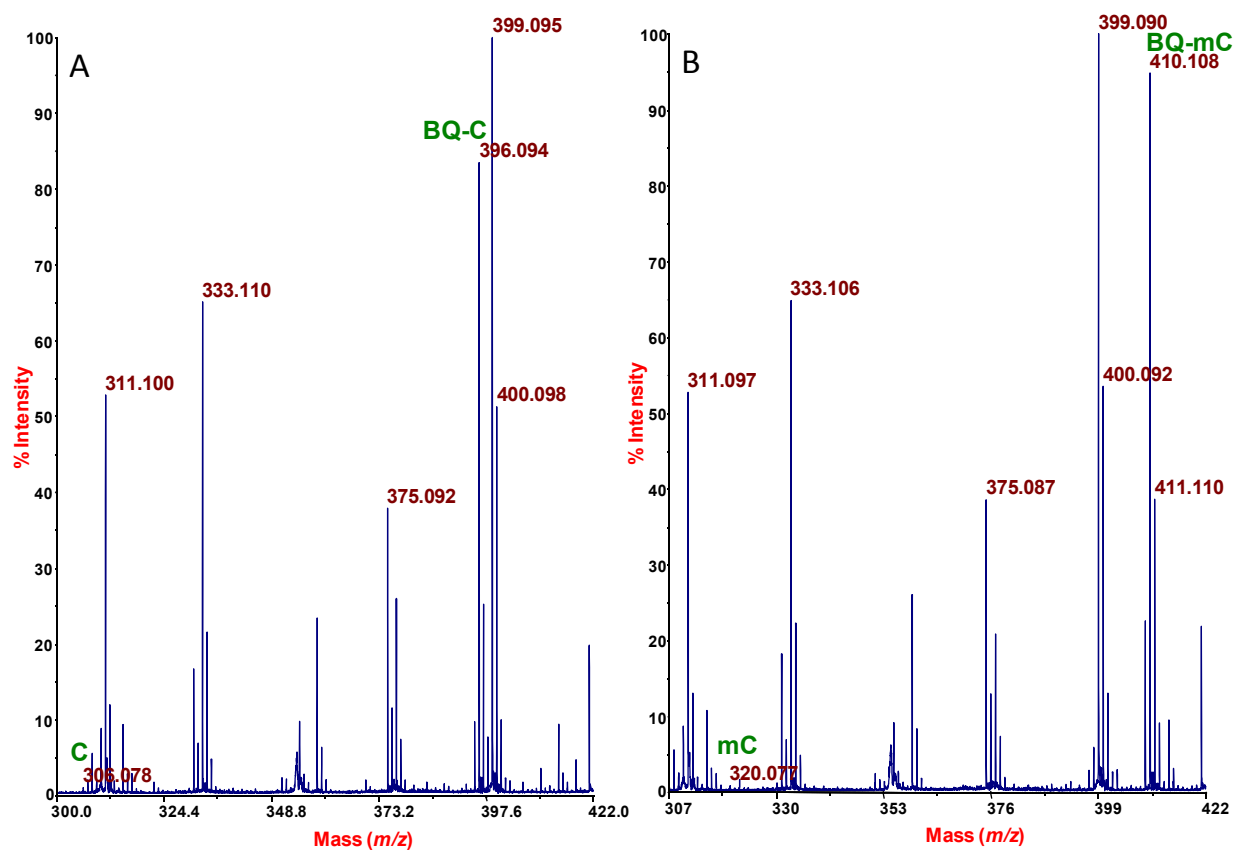

**Supplemental Figure 3.** Analysis (without mass tagging) by MALDI-TOF-MS of two reaction mixtures: (A) dCMP plus BQ, where a tiny peak for unreacted dCMP is seen at  $m/z$  306.078, and a peak for BQ-dCMP is seen at  $m/z$  396.094; and (B) mdCMP plus BQ, where a tiny peak for residual mdCMP is seen at  $m/z$  320.077, and a peak for BQ-mdCMP is seen at  $m/z$  410.108.

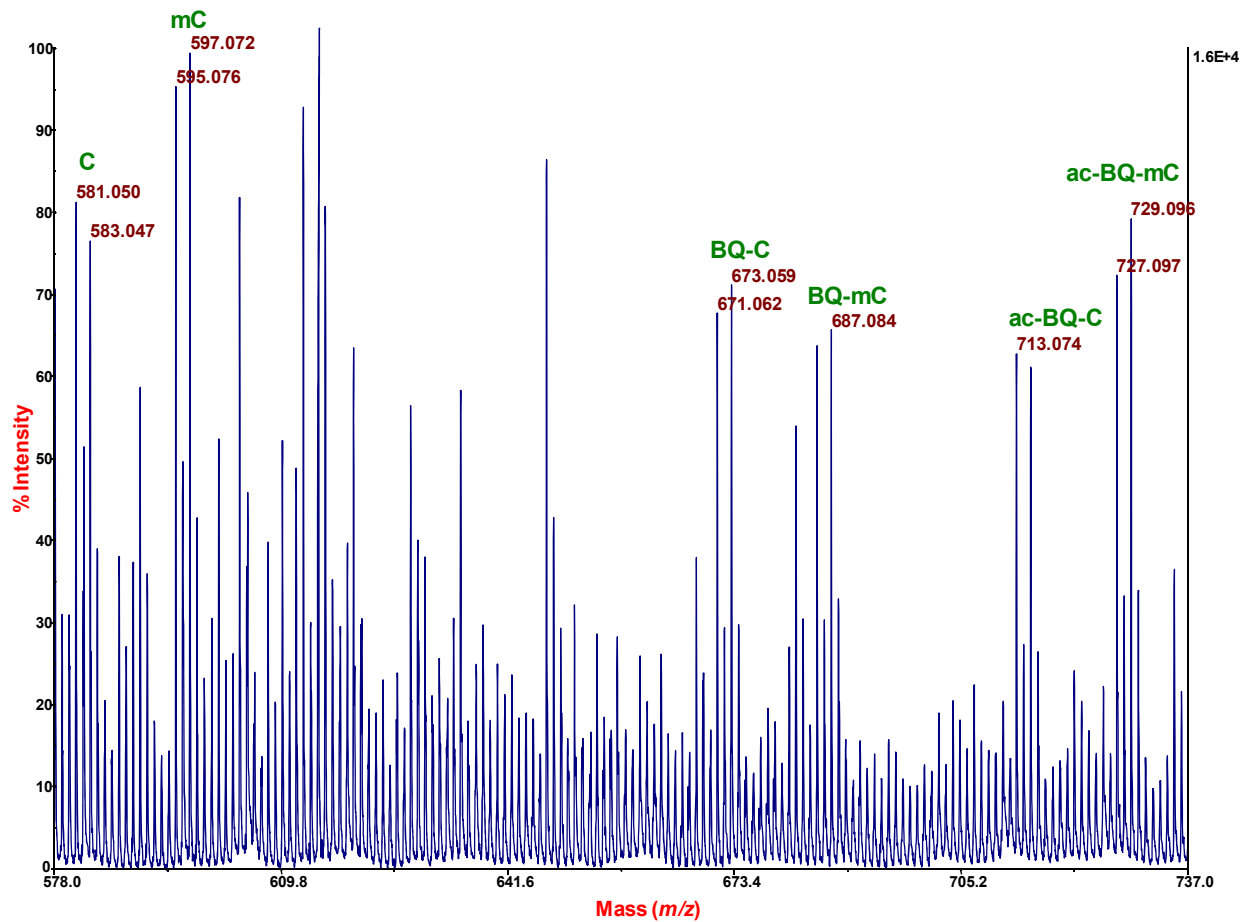

**Supplemental Figure 4.** Spectrum obtained by combining the two reaction mixtures of Supplemental Figure 3, labeling with BrBH, and subjecting the resulting mixture to MALDI-TOF-MS. Peak assignments (some of which are not labeled in the figure because of space limitations): 581.050 and 583.047 (BrBH-BQ-dCMP), 595.076 and 597.072 (BrBH-BQ-mdCMP), 671.062 and 673.059 (BrBH-BQ-dCMP), 685.086 and 687.084 (BrBH-BQ-mdCMP), 713.074 and 715.067 (BrBH-acetylBQ-dCMP), and 727.097 and 729.096 (BrBH-acetylBQ-mdCMP).

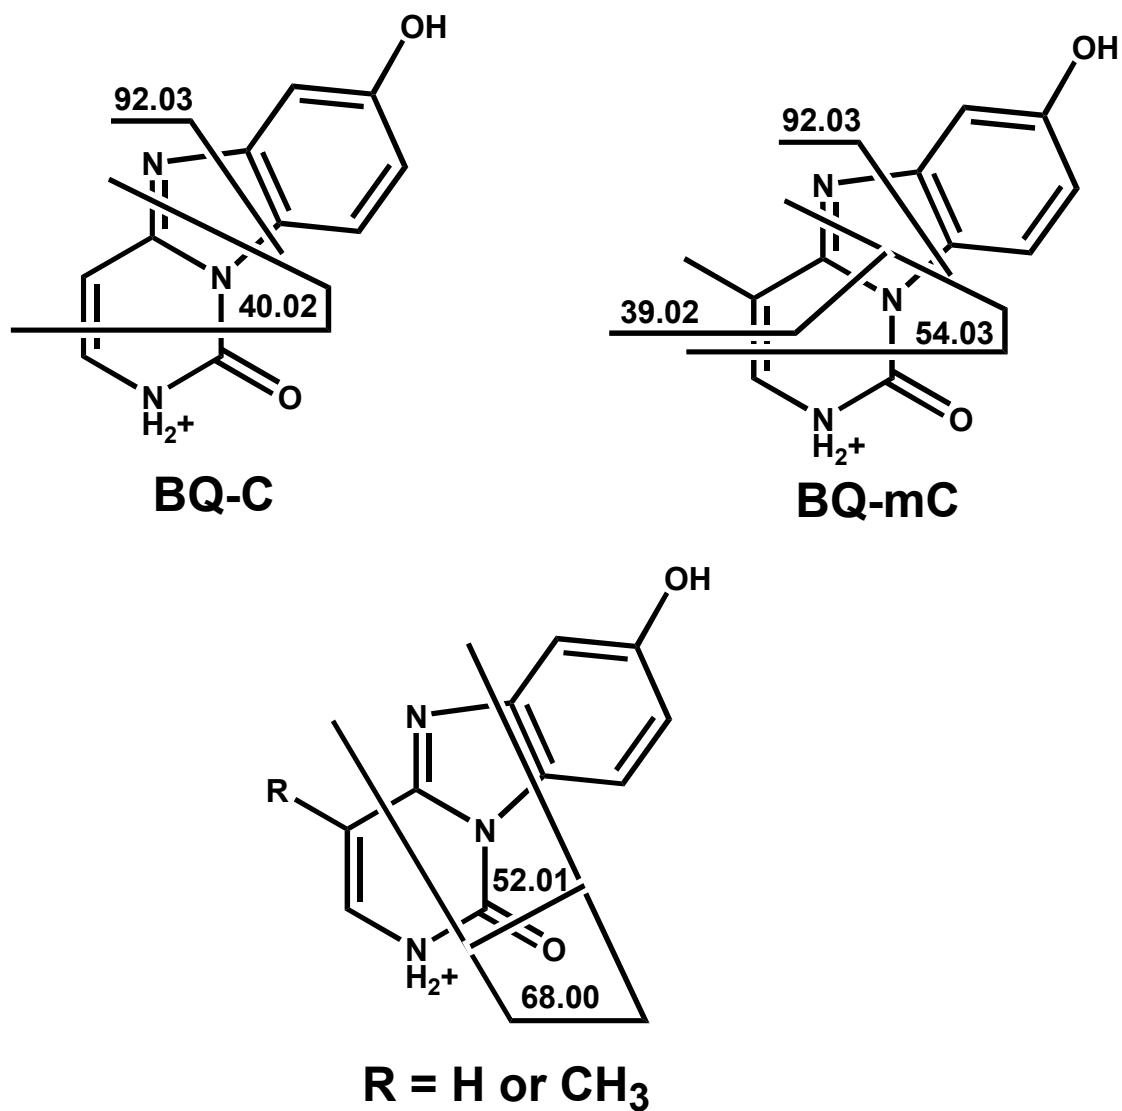

**Supplemental Figure 5.** Additional fragment ion assignments in regard to Figure 5:  $m/z$  40.02 (C<sub>2</sub>H<sub>2</sub>N) for BQ-C;  $m/z$  54.03 (C<sub>3</sub>H<sub>4</sub>N) and 39.02 (C<sub>3</sub>H<sub>3</sub>) for BQ-mC; and  $m/z$  52.01 (C<sub>2</sub>N<sub>2</sub>), 68.00 (C<sub>2</sub>N<sub>2</sub>O), and 92.03 (C<sub>6</sub>H<sub>4</sub>O) common for both.
